# Supplementary material for: The Prevalence of Multidrug Resistance of Helicobacter pylori and Its Impact on Eradication in Korea from 2017 to 2019: A Single-Center Study
Source: MDPI journal article supplement (doi:10.3390/antibiotics9100646), 2020-09-27
Supplement: s1 [file s1]

**Table S1** Differences in the resistance of *Helicobacter pylori* strains from the antrum and the body for each antibiotic agent (n=52).

| Antibiotic agents | Resistance (Antrum) | Resistance (Body) | Discordant resistance pattern* |
|-------------------|---------------------|-------------------|--------------------------------|
| Clarithromycin    | 17 (32.7%)          | 17 (32.7%)        | 2 (3.8%)                       |
| Metronidazole     | 12 (23.1%)          | 15 (28.8%)        | 3 (5.8%)                       |
| Amoxicillin       | 12 (23.1%)          | 12 (23.1%)        | 0 (0%)                         |
| Tetracycline      | 5 (9.6%)            | 9 (17.3)          | 8 (15.4%)                      |
| Levofloxacin      | 24 (46.2%)          | 23 (44.2%)        | 3 (5.8%)                       |
| Moxifloxacin      | 24 (46.2%)          | 23 (44.2%)        | 3 (5.8%)                       |

Values are shown as number (%).

\*Discordant resistance pattern means that there is a difference in the presence of antibiotic resistance between the strains from the antrum and the body in a single host.
