# Supplementary material for: The Prevalence of Multidrug Resistance of Helicobacter pylori and Its Impact on Eradication in Korea from 2017 to 2019: A Single-Center Study
Source: Antibiotics (Basel). 2020 Sep 27;9(10):646. doi: 10.3390/antibiotics9100646 (PMC7601770; doi:10.3390/antibiotics9100646)
Supplement: Supplementary file 1 [file antibiotics-09-00646-s001.zip › Supplementary materials_Table S2.xlsx]

## Sheet: Sheet 1
* Resistance to levofloxacin and moxifloxacin was counted as a single resistance to quinolone class.
Patient No.	MDR (including quinolone)	Number of resistance (includes Q)	MDR (excluding quinolone)	Number of resistance (excludes Q)	clari	metro	amoxi	tetra	levo	moxi	all susceptible
1					0.0625	4	0.125	0.25	0.25	0.25	v
2		1			0.0625	4	0.125	0.5	8	8
3					0.0625	2	0.125	1	0.5	0.5	v
4		1			0.0625	8	0.125	1	8	8
5	v	2	v	2	16	32	0.125	1	0.5	0.5
6	v	3	v	2	8	4	0.5	1	8	8
7					0.0625	2	0.125	1	0.25	0.25	v
8	v	3	v	2	0.0625	16	0.25	1	8	8
9					0.0625	2	0.125	0.5	1	0.25	v
10	v	2		1	0.0625	16	0.125	0.5	4	4
11	v	3	v	2	0.0625	16	0.125	4	16	16
12	v	3	v	2	0.0625	16	0.5	1	8	8
13		1		1	0.0625	2	0.125	2	0.5	0.5
14					0.0625	2	0.125	0.5	0.5	0.5	v
15	v	2		1	0.0625	2	0.125	4	16	16
16					0.0625	2	0.125	0.5	0.5	0.5	v
17		1		1	0.0625	64	0.125	0.5	0.5	0.5
18					0.0625	2	0.125	1	0.25	0.25	v
19	v	3	v	3	8	4	2	2	0.25	0.25
20		1		1	0.0625	128	0.125	1	1	1
21		1			0.0625	8	0.125	1	8	8
22					0.0625	8	0.125	1	0.5	0.5	v
23	v	2		1	0.0625	2	0.125	2	4	4
24		1		1	16	8	0.125	0.5	0.5	0.5
25		1		1	0.0625	4	0.125	2	0.5	0.5
26	v	2		1	0.0625	2	0.125	2	16	16
27	v	2		1	0.0625	64	0.125	0.5	8	8
28					0.0625	2	0.125	0.25	0.5	0.25	v
29	v	3	v	3	1	64	0.125	2	0.5	0.5
30	v	2	v	2	4	16	0.125	0.5	0.5	0.25
31	v	2		1	0.0625	32	0.125	0.5	4	4
32	v	4	v	3	0.0625	64	0.25	2	8	8
33					0.0625	2	0.125	1	0.5	0.25	v
34	v	5	v	4	4	64	0.5	2	16	16
35	v	3	v	2	8	2	2	1	8	8
36		1		1	0.0625	2	0.125	2	0.5	0.25
37	v	2		1	0.0625	2	0.25	1	8	8
38	v	3	v	2	0.0625	64	0.125	2	8	8
39		1			0.0625	2	0.125	0.5	16	16
40		1			0.0625	2	0.125	0.5	8	8
41					0.0625	2	0.125	0.5	0.5	0.5	v
42	v	3	v	2	16	2	0.25	0.5	8	8
43					0.0625	2	0.125	0.125	0.25	0.5	v
44					0.0625	2	0.125	0.25	0.5	0.5	v
45		1		1	0.0625	2	0.5	0.125	0.125	0.25
46		1		1	0.0625	2	0.5	0.25	0.125	0.125
47					0.0625	2	0.125	0.25	0.125	0.125	v
48		1		1	16	2	0.125	0.125	1	1
49	v	2		1	0.0625	2	0.125	2	2	2
50		1		1	16	4	0.125	1	1	1
51		1		1	4	2	0.125	0.125	0.25	0.25
52	v	2	v	2	8	128	0.125	0.25	0.125	0.25
53	v	2		1	0.0625	16	0.125	0.5	2	2
54		1		1	4	2	0.125	1	0.5	0.5
55					0.0625	2	0.125	0.125	0.25	0.25	v
56					0.0625	2	0.125	0.125	0.5	0.5	v
57	v	2		1	8	2	0.125	0.125	16	16
58	v	2		1	2	2	0.125	0.125	16	16
59	v	2		1	8	2	0.125	0.125	16	16
60					0.0625	2	0.125	0.125	0.25	0.25	v
61	v	3	v	2	16	2	4	0.125	16	16
62					0.0625	2	0.125	0.125	0.125	0.5	v
63	v	4	v	3	16	64	0.25	1	2	4
64		1		1	0.0625	64	0.125	0.5	0.25	0.25
65	v	2		1	0.0625	2	0.25	0.5	2	2
66		1		1	0.0625	128	0.125	1	0.25	0.25
67					0.0625	2	0.125	0.125	0.125	0.125	v
68					0.0625	2	0.125	0.125	0.125	0.125	v
69	v	2		1	8	2	0.125	0.25	16	16
70					0.0625	2	0.125	0.5	0.125	0.125	v
